# Supplementary material for: A novel Lewis acid-promoted enyne cycloisomerization of triester-substituted alkenes
Source: Royal Society of Chemistry journal article supplement (doi:10.1039/b008103p), 2001-01-01
Supplement: b008103p.doc [file b008103p.doc]

# Supplementary data

**A Novel Lewis Acid-promoted Enyne Cycloisomerization of Triester-substituted Alkenes**

Shoko Yamazaki,* Kuriko Yamada, Tetsuya Otsubo, Masayo Haruna, and Emiko Kutsuwa

*Department of Chemistry, Nara University of Education, Takabatake-cho, Nara 630-8528, Japan*

Hatsue Tamura

*Department of Applied Chemistry, Graduate School of Engineering, Osaka University, 1-16 Machikaneyama, Toyonaka, Osaka 560-0043, Japan*

# Experimental Procedures and Spectral Data

**General Methods.** Mps were measured on a Yamato MP-21 melting point apparatus and are uncorrected. IR spectra were recorded with a JASCO FT-IR 5000 spectrophotometer. NMR spectra were recorded on a Varian INOVA 400 spectrometer. Chemical shifts are reported in ppm relative to Me4Si or residual nondeuterated solvent. *J*-Values are given in Hz. 13C mutiplicities were determined by DEPT and HSQC. Mass spectra were recorded on a JEOL JMS-SX-102 spectometer at an ionizing voltage of 70 eV by EI or FAB. All reactions were carried out under a nitrogen atmosphere.

**Preparation of Enyne Substrates 4, 1 and 10.** **4a-c** were prepared by the reaction of diethyl ketomalonate with propargyl (triphenylphosphoranylidene)acetate (for **10a**), and subsequent Sonogashira coupling1 with aryl iodides. **4d-e** were prepared by the reaction of diethyl ketomalonate with 2-but-3-ynyl (triphenylphosphoranylidene)acetate and 3-hex-1-ynyl (triphenylphosphoranylidene)acetate, and subsequent Sonogashira coupling with phenyl iodide. **4f-g** were prepared by the reaction of dimethyl ketomalonate2 and diisopropyl ketomalonate3 with propargyl (triphenyl­phosphoranylidene)acetate, and subsequent Sonogashira coupling with phenyl iodide. **1** was prepared by the reaction of diethyl ketomalonate with 2-but-2-ynyl (triphenylphosphoranylidene)acetate, and subsequent Sonogashira coupling with phenyl iodide. **10b** was prepared by the reaction of diethyl ketomalonate with 1-but-3-ynyl (triphenylphosphoranylidene)acetate (for **10c**), and subsequent Sonogashira coupling with phenyl iodide.

**Propargyl chloroacetate.** Propargyl alcohol (8.8 mL, 8.5 g, 0.152 mmol) was dissolved in diethyl ether (200 mL) containing pyridine (12.3 mL, 12.0 g, 0.152 mmol), and the solution was cooled to 0 °C. Chloroacetyl chloride (12.1 mL, 17.2 g, 0.152 mmol) was added dropwise to the solution. After stirring for 1 h, the mixture was pourded into ice water and the aqueous layer was extracted with ether three times. The ether layers were combined and dried over Na2SO4. The solvent was distilled under a nitrogen atmosphere, and the residue was distilled under reduced pressure to give the title compound (19.04 g, 95%). Colorless oil; bp 71-73 °C/11 mmHg4; H (400 MHz, CDCl3) 2.54 (1H, t, *J* 2.5), 4.80 (1H, d, *J* 2.5) and 4.12 (2H, s); C (100.6 MHz, CDCl3) 40.59 (t), 53.57 (t), 75.91 (d, C*C*H), 76.67 (s) and 166.68 (s); IR (neat) 3298, 2962, 2134, 1767, 1412, 1375, 1313, 1168 and 996 cm-1.

**2-But-3-ynyl chloroacetate.** (Yield 79%) Colorless oil; bp 72 °C/10 mmHg; H (400 MHz, CDCl3) 1.56 (3H, d, *J* 6.7), 2.51 (1H, d, *J* 2.2), 4.09 (1H, s) and 5.51 (1H, qd, *J* 6.7 and 2.2); C (100.6 MHz, CDCl3) 21.17 (q), 40.87 (t), 62.17 (d), 73.93 (d, C*C*H), 81.16 (s) and 166.33 (s); IR (neat) 3298, 2998, 2962, 2128, 1760, 1412, 1321, 1282, 1172, 1093, 1029 and 957 cm-1.

**3-Hex-1-ynyl chloroacetate.** (Yield 73%) Colorless oil; bp 110-115 °C/31 mmHg; H (400 MHz, CDCl3) 0.963 (3H, t, *J* 7.4), 1.45-1.54 (2H, m), 1.78-1.84 (2H, m), 4.09 (2H, s) and 5.43 (1H, td, *J* 6.7 and 2.1); C (100.6 MHz, CDCl3) 13.58 (q), 18.19 (t), 36.51 (t), 40.85 (t), 65.69 (d), 74.48 (d, C*C*H), 80.32 (s) and 166.45 (s); IR (neat) 3300, 2968, 2878, 2128, 1760, 1466, 1412, 1284, 1174, 982 and 930 cm-1.

**1-But-2-ynyl chloroacetate.** (Yield 78%) Colorless crystals; mp 29-31 °C; bp 79-82 °C/1 mmHg; H (400 MHz, CDCl3) 1.87 (3H, t, *J* 2.4), 4.11 (2H, s) and 4.76 (2H, q, *J* 2.4); C (100.6 MHz, CDCl3) 3.76 (q), 40.77 (t), 54.56 (t), 72.26 (s), 84.40 (s) and 166.86 (s); IR (neat) 2968, 2248, 1745, 1410, 1317 and 1174 cm-1.

**1-But-3-ynyl choroacetate.** (Yield 93%) Colorless oil; bp 84-85 °C/13 mmHg; H (400 MHz, CDCl3) 2.02 (1H, t, *J* 2.6), 2.58 (2H, td, *J* 6.8 and 2.6), 4.10 (s, 2H) and 4.31 (2H, t, *J* 6.8); C (100.6 MHz, CDCl3) 18.95 (t), 40.79 (t), 63.76 (t), 70.37 (d, C*C*H), 79.45 (s) and 167.21 (s); IR (neat) 3298, 2966, 2126, 1760, 1412, 1315, 1180 and 1002 cm-1.

**1,1-Diethyl 2-propargyl ethene-1,1,2-tricarboxylate (10a).** To an ice-water-cooled solution of diethyl ketomalonate (0.79 mL, 0.902 g, 5.18 mmol) in benzene (10.3 mL) was added propargyl (triphenylphosphoranylidene)acetate (1.856 g, 5.18 mmol). The mixture was allowed to warm to room temperature and stirred for 5 h. The benzene was evaporated, and ether was added. The precipitate was removed by filtration. The filtrate was concentrated and the residue was purified by column chromatography over silica ge eluting with hexane-ether (1 : 2) to give the title compound (860 mg, 65%) (Rf = 0.7). Colorless crystals; mp 55-56 °C; H (400 MHz, CDCl3) 1.32 (3H, t, *J* 7.1), 1.36 (3H, t, *J* 7.1), 2.52 (1H, t, *J* 2.4), 4.31 (2H, q, *J* 7.1), 4.39 (2H, q, *J* 7.1), 4.79 (2H, d, *J* 2.4) and 6.89 (1H, s); C (100.6 MHz, CDCl3) 13.99 (q), 14.04 (q), 53.14 (t), 62.34 (t), 62.72 (t), 75.85 (d), 76.64 (s), 128.80 (d), 140.02 (s), 162.12 (s), 162.83 (s) and 164.03 (s); IR (KBr) 3272, 3084, 2992, 2968, 2948, 2136, 1730, 1398, 1381, 1371, 1350, 1260, 1180, 1073 and 1033 cm-1; MS (EI) *m/z* 254; Anal. Calcd for C12H14O6: C, 56.69; H, 5.55. Found: C, 56.60; H, 5.51.

**1,1-Diethyl 2-(2’-but-3’-ynyl) ethene-1,1,2-tricarboxylate.** (Yield 54%) (Rf = 0.7 (hexane-ether = 1 : 2)). Colorless oil; H (400 MHz, CDCl3) 1.32 (3H, t, *J* 7.1), 1.36 (3H, t, *J* 7.1), 1.55 (3H, d, *J* 6.6), 2.50 (1H, d, *J* 2.1), 4.31 (2H, q, *J* 7.1), 4.38 (2H, q, *J* 7.1), 5.51 (1H, qd, *J* 6.6 and 2.1) and 6.88 (1H, s); C (100.6 MHz, CDCl3) 13.96 (q), 14.01 (q), 21.14 (q), 61.62 (d), 62.24 (t), 62.63 (t), 73.84 (d, C*C*H), 81.12 (s), 129.37 (d), 139.62 (s), 162.18 (s), 162.43 (s) and 164.07 (s); IR (neat) 3286, 2990, 2944, 2128, 1734, 1448, 1377, 1261, 1181, 1093, 1067 and 1027 cm-1; MS (FAB) *m/z* 269 (M++1).

**1,1-Diethyl 2-(3’-hex-1’-ynyl) ethene-1,1,2-tricarboxylate.** (Yield 36%) (Rf = 0.5 (hexane-ether = 1 : 2)). Pale yellow oil; H (400 MHz, CDCl3) 0.954 (3H, t, *J* 7.3), 1.32 (3H, t, *J* 7.1), 1.36 (3H, t, *J* 7.1), 1.44-1.53 (2H, m), 1.75-1.82 (2H, m), 2.49 (1H, d, *J* 2.0), 4.31 (2H, q, *J* 7.1), 4.38 (2H, q, *J* 7.1), 5.44 (1H, td, *J* 6.7 and 2.2) and 6.88 (1H, s); C (100.6 MHz, CDCl3) 13.58 (q), 13.96 (q), 14.03 (q), 18.18 (t), 36.49 (t), 62.25 (t), 62.64 (t), 65.18 (d), 74.42 (d, C*C*H), 80.27 (s), 129.43 (d), 139.57 (s), 162.21 (s), 162.54 (s) and 164.10 (s); IR (neat) 3282, 2968, 2878, 2126, 1729, 1653, 1468, 1377, 1259, 1180, 1067, 1021, 930 and 864 cm-1; MS (EI) *m/z* 296.

**1,1-Dimethyl 2-propargyl ethene-1,1,2-tricarboxylate.** (Yield 51%) (Rf = 0.4 (hexane-ether = 1 : 2)). Colorless oil; H (400 MHz, CDCl3) 2.53 (1H, t, *J* 2.5), 3.87 (3H, s), 3.92 (3H, s), 4.79 (1H, d, *J* 2.5) and 6.93 (1H, s); C (100.6 MHz, CDCl3) 53.18 (q), 53.26 (t), 53.49 (q), 75.97 (d, C*C*H), 76.54 (s), 129.53 (d), 139.30 (s), 162.46 (s), 162.72 (s) and 164.48 (s); IR (neat) 3284, 2960, 2134, 1734, 1653, 1439, 1381, 1352, 1261, 1168, 1071, 1033 and 1000 cm-1; MS (EI) *m/z* 226.

**1,1-Diisopropyl 2-propargyl ethene-1,1,2-tricarboxylate.** (Yield 31%) (Rf = 0.4 (hexane-ether = 2 : 1)). Colorless oil; H (400 MHz, CDCl3) 1.30 (6H, d, *J* 6.2), 1.35 (6H, d, *J* 6.4), 2.52 (1H, t, *J* 2.5), 4.78 (2H, d, *J* 2.5), 5.13 (1H, septet, *J* 6.3), 5.28 (1H, septet, *J* 6.3) and 6.85 (1H, s); C (100.6 MHz, CDCl3) 21.59 (q), 21.66 (q), 53.04 (t), 70.06 (d), 70.70 (d), 75.81 (d, C*C*H), 76.67 (s), 128.09 (d), 140.68 (s), 161.66 (s), 162.84 (s) and 163.58 (s); IR (neat) 3274, 2988, 2134, 1734, 1647, 1470, 1456, 1379, 1334 and 1259 cm-1; MS (EI) *m/z* 282; exact mass M+ 282.1048 (calcd for C14H18O6 282.1103).

**1,1-Diethyl 2-(1’-but-2’-ynyl) ethene-1,1,2-tricarboxylate (1).** (Yield 71%) (Rf = 0.6 (hexane-ether = 1 : 2)). Colorless crystals; mp 34-35 °C; H (400 MHz, CDCl3) 1.32 (3H, t, *J* 7.1), 1.36 (3H, t, *J* 7.1), 1.86 (3H, t, *J* 2.4), 4.30 (2H, q, *J* 7.1), 4.39 (2H, q, *J* 7.1), 4.75 (2H, q, *J* 2.4) and 6.90 (1H, s); C (100.6 MHz, CDCl3) 3.73 (q), 13.97 (q), 14.03 (q), 54.08 (t), 62.28 (t), 62.66 (t), 72.20 (s), 84.26 (s), 129.19 (d), 139.68 (s), 162.18 (s), 163.02 (s) and 164.16 (s); IR (KBr) 2986, 2254, 1735, 1725, 1657, 1464, 1348, 1270, 1180 and 1025 cm-1; MS (EI) *m/z* 268; exact mass M+ 268.0995 (calcd for C13H16O6 268.0947); Anal. Calcd for C13H16O6: C, 58.20; H, 6.01. Found: C, 58.24; H, 5.98.

**1,1-Diethyl 2-(1’-but-3’-ynyl) ethene-1,1,2-tricarboxylate (10c).** (Yield 91%) (Rf = 0.6 (hexane-ether = 1 : 2)). Colorless oil; H (400 MHz, CDCl3) 1.32 (t, *J* 7.0, 3H), 1.36 (t, *J* 7.1, 3H), 2.02 (1H, t, *J* 2.6), 2.57 (2H, td, *J* 6.8 and 2.6), 4.30 (2H, t, *J* 6.8), 4.31 (2H, q, *J* 7.0), 4.38 (2H, q, *J* 7.1) and 6.89 (1H, s); C (100.6 MHz, CDCl3) 13.98 (q), 14.02 (q), 18.85 (t), 62.22 (t), 62.62 (t), 63.37 (t), 70.35 (d), 79.49 (s), 129.41 (d), 139.58 (s), 162.22 (s), 163.36 (s) and 164.18 (s); IR (neat) 3290, 2986, 2121, 1730, 1653, 1375, 1348, 1249, 1183, 1067 and 1021 cm-1; MS (FAB) *m/z* 269 (M++1); Anal. Calcd for C13H16O6: C, 58.20; H, 6.01. Found: C, 57.92; H, 5.95.

**Typical procedure for preparation of 4a-g and 10b.** A mixture of 1,1-diethyl propargyl ethene-1,1-2-tricarboxylate (**10a**) (763 mg, 3.0 mmol), iodobenzene (0.34 mL, 612 mg, 3.0 mmol), PdCl2(PPh3)2 (42 mg, 0.06 mmol), and CuI (23 mg, 0.12 mmol) in Et2NH (8.2 mL) was stirred at room temperature for 21 h. After removal of diethylamine under reduced pressure, water was added to the residue. The mixture was extracted with ether. The organic phase was washed with saturated aqueous NaCl, dried (MgSO4), and evaporated *in vaccuo*. The residue was purified by column chromatography over silica gel eluting with hexane-ether (1 : 2) to give **4a** (615 mg, 62%) (Rf = 0.6). Yellow oil; H (400 MHz, CDCl3) 1.32 (3H, t, *J* 7.1), 1.35 (3H, t, *J* 7.1), 4.31 (2H, q, *J* 7.1), 4.39 (2H, q, *J* 7.1), 5.02 (2H, s), 6.93 (1H, s), 7.30-7.35 (3H, m) and 7.44-7.46 (2H, m); C (100.6 MHz, CDCl3) 13.98 (q), 14.03 (q), 54.08 (t), 62.31 (t), 62.68 (t), 81.87 (s), 87.39 (s), 121.92 (s), 128.42 (d), 129.04 (d), 129.07 (d), 131.97 (d), 139.83 (s), 162.17 (s), 162.99 (s) and 164.10 (s); IR (neat) 2986, 2244, 1734, 1653, 1444, 1373, 1346, 1257, 1166, 1067, 1033, 760 and 692 cm-1; MS (EI) *m/z* 330; exact mass M+ 330.1084 (calcd for C18H18O6 330.1103).

**4b** (Yield 46%) (Rf = 0.7 (hexane-ether = 1 : 2)): Yellow oil; H (400 MHz, CDCl3) 1.32 (2H, t, *J* 7.1), 1.35 (3H, t, *J* 7.1), 2.35 (3H, s), 4.31 (2H, q, *J* 7.1), 4.39 (2H, q, *J* 7.1), 5.01 (2H, s), 6.93 (1H, s), 7.12-7.14 (2H, d-like, *J* 8.1) and 7.33-7.36 (2H, d-like, *J* 8.1); C (100.6 MHz, CDCl3) 13.97 (q), 14.02 (q), 21.59 (q), 54.20 (t), 62.31 (t), 62.66 (t), 81.18 (s), 87.58 (s), 118.81 (s), 129.12 (d), 129.18 (d), 131.87 (d), 139.27 (s), 139.77 (s), 162.17 (s), 163.00 (s) and 164.13 (s); IR (neat) 2986, 2230, 1734, 1653, 1512, 1373, 1346, 1259, 1166, 1067, 1031 and 818 cm-1; MS (EI) *m/z* 344; exact mass M+ 344.1247 (calcd for C19H20O6 344.1260).

**4c** (Yield 47%) (Rf = 0.8 (hexane-ether = 1 : 2)); Yellow oil; H (400 MHz, CDCl3) 1.32 (3H, t, *J* 7.1), 1.35 (3H, t, *J* 7.1), 3.82 (3H, s), 4.31 (2H, q, *J* 7.1), 4.39 (2H, q, *J* 7.1), 5.01 (2H, s), 6.84 (2H, d-like, *J* 9.0), 6.93 (1H, s) and 7.39 (2H, d-like, *J* 9.0); C (100.6 MHz, CDCl3) 13.98 (q), 14.03 (q), 54.29 (t), 55.37 (q), 62.33 (t), 62.68 (t), 80.53 (s), 87.45 (s), 113.90 (s), 114.04 (d), 129.15 (d), 133.54 (d), 139.74 (s), 160.15 (s), 162.18 (s), 163.02 (s) and 164.16 (s); IR (neat) 2986, 2230, 1730, 1653, 1607, 1512, 1373, 1346, 1247, 1166, 1067, 1035, 835 and 733 cm-1; MS (EI) *m/z* 360; exact mass M+ 360.1211 (calcd for C19H20O7 360.1209).

**4d** (Yield 53%) (Rf = 0.7 (hexane-ether = 1 : 2)); Yellow oil; H (400 MHz, CDCl3) 1.32 (3H, t, *J* 7.1), 1.34 (3H, t, *J* 7.1), 1.62 (3H, d, *J* 6.6), 4.30 (2H, q, *J* 7.1), 4.38 (2H, qd, *J* 7.1 and 0.7), 5.76 (1H, q, *J* 6.6), 6.91 (1H, s), 7.28-7.34 (3H, m) and 7.42-7.45 (2H, m); C (100.6 MHz, CDCl3) 13.94 (q), 14.00 (q), 21.42 (q), 62.21 (t), 62.49 (d), 62.58 (t), 85.44 (s), 86.37 (s), 121.99 (s), 128.33 (d), 128.84 (d), 129.65 (d), 131.89 (d), 139.42 (s), 162.21 (s), 162.53 (s) and 164.13 (s); IR (neat) 2988, 2238, 1729, 1647, 1446, 1377, 1257, 1180, 1067 and 1023 cm-1; MS (EI) *m/z* 344; exact mass M+ 344.1272 (calcd for C19H20O6 344.1260).

**4e** (Yield 39%) (Rf = 0.4 (hexane-ether = 3 : 1)). Yellow oil; H (400 MHz, CDCl3) 0.983 (3H, t, *J* 7.4), 1.32 (3H, t, *J* 7.1), 1.34 (3H, t, *J* 7.3), 1.50-1.58 (2H, m), 1.84-1.90 (2H, m), 4.31 (2H, q, *J* 7.1), 4.43 (2H, m), 5.69 (1H, t, *J* 6.6), 6.92 (1H, s), 7.28-7.36 (3H, m) and 7.42-7.45 (2H, m); C (100.6 MHz, CDCl3) 13.70 (q), 13.97 (q), 14.05 (q), 18.40 (t), 36.85 (t), 62.26 (t), 62.62 (t), 66.06 (d), 85.59 (s), 86.12 (s), 122.13 (s), 128.36 (d), 128.82 (d), 129.75 (d), 131.95 (d), 139.41 (s), 162.29 (s), 162.69 (s) and 164.19 (s); IR (neat) 2966, 2940, 2878, 2240, 1729, 1651, 1377, 1344, 1251, 1180, 1067 and 1023 cm-1; MS (EI) *m/z* 372; exact mass M+ 372.1548 (calcd for C21H24O6 372.1573).

**4f** (Yield 54%) (Rf = 0.7 (hexane-ether = 1 : 2)). Yellow oil; H (400 MHz, CDCl3) 3.87 (3H, s), 3.91 (3H, s), 5.02 (2H, s), 6.97 (1H, s), 7.30-7.38 (3H, m) and 7.44-7.47 (2H, m); C (100.6 MHz, CDCl3) 53.18 (q), 53.48 (q), 54.22 (t), 81.79 (s), 87.48 (s), 121.86 (s), 128.46 (d), 129.08 (d), 129.84 (d), 131.97 (d), 139.13 (s), 162.54 (s), 162.90 (s) and 164.57 (s); IR (neat) 2958, 2238, 1734, 1653, 1491, 1441, 1352, 1270, 1168, 1071 and 1033 cm-1; MS (EI) *m/z* 302; exact mass M+ 302.0798 (calcd for C16H14O6 302.0790).

**4g** (Yield 68%) (Rf = 0.3 (hexane-ether = 1 : 1)). Yellow oil; H (400 MHz, CDCl3) 1.30 (6H, d, *J* 6.2), 1.34 (6H, d, *J* 6.2), 5.02 (2H, s), 5.13 (1H, septet, *J* 6.2), 5.28 (1H, septet, *J* 6.2), 6.89 (1H, s), 7.29-7.37 (3H, m) and 7.44-7.47 (2H, m); C (100.6 MHz, CDCl3) 21.59 (q), 21.66 (q), 53.98 (t), 70.03 (d), 70.64 (d), 81.93 (s), 87.32 (s), 121.92 (s), 128.37 (d), 128.40 (d), 129.00 (d), 131.95 (d), 140.50 (s), 161.71 (s), 163.02 (s) and 163.66 (s); IR (neat) 2984, 2942, 2246, 1729, 1647, 1493, 1470, 1370, 1257, 1172 and 1106 cm-1; MS (EI) *m/z* 358.

**10b** (Yield 68%) (Rf = 0.6 (hexane-ether = 1 : 2)); Yellow oil; H (400 MHz, CDCl3) 1.32 (3H, t, *J* 7.1), 1.35 (3H, t, *J* 7.1), 2.79 (2H, t, *J* 6.9), 4.31 (2H, q, *J* 7.1), 4.37 (2H, t, *J* 6.9), 4.38 (2H, q, *J* 7.1), 6.91 (1H, s), 7.27-7.31 (3H, m) and 7.38-7.42 (2H, m); C (100.6 MHz, CDCl3) 14.01 (q), 14.04 (q), 19.85 (t), 62.25 (t), 62.63 (t), 63.68 (t), 82.39 (s), 84.84 (s), 123.21 (s), 128.13 (d), 128.33 (d), 129.55 (d), 131.75 (d), 139.54 (s), 162.27 (s), 163.46 (s) and 164.23 (s); IR (neat) 2986, 2362, 1729, 1653, 1491, 1444, 1375, 1348, 1261, 1181 and 1067 cm-1; MS (EI) *m/z* 344; exact mass M+ 344.1285 (calcd for C19H20O6 344.1260); Anal. Calcd for C19H20O6: C, 66.27; H, 5.85. Found: C, 66.12; H, 5.89.

**Typical cyclization procedure for 5a-g.** To a solution of **4a** (100 mg, 0.30 mmol) in dichloromethane (0.7 mL) was added ZnBr2 (79 mg, 0.35 mmol), followed by THF (25 L, 22 mg, 0.30 mmol) at -78 °C. The mixture was allowed to warm to -40 °C and stirred for 19 hours. The reaction mixture was quenched by triethylamine (0.1 mL, 71 mg, 0.70 mmol) and then saturated aqueous NaHCO3. The mixture was extracted with dichloromethane and the organic phase was washed with water, dried (Na2SO4), and evaporated *in vacuo*. The residue was purified by column chromatography over silica gel eluting with hexane-ether (1 : 1) to give **5a** (67 mg, 67%) (Rf = 0.4). An analytically pure sample was recrystallized from ethyl acetate. Yellow crystals; mp 98-99 °C (ethyl acetate); H (400 MHz, CDCl3) 1.34 (3H, t, *J* 7.1), 1.37 (3H, t, *J* 7.1), 4.35 (2H, q, *J* 7.1), 4.41 (2H, q, *J* 7.1), 5.18 (2H, d, *J* 2.4), 7.25-7.28 (2H, m), 7.39-7.46 (3H, m) and 8.15 (1H, t, *J* 2.4). Selected NOE's in the 2D-NOESY spectra were between  8.15 and 7.25-7.28, and  5.18 and 7.25-7.28.; C (100.6 MHz, CDCl3) 13.90 (q), 14.00 (q), 62.47 (t), 62.48 (t), 69.89 (t), 128.27 (s), 129.12 (d), 129.78 (s), 129.84 (d), 132.20 (s), 134.93 (s), 136.88 (d), 163.03 (s), 164.75 (s) and 167.85 (s); IR (KBr) 2984, 1775, 1738, 1700, 1584, 1361, 1294, 1257, 1232, 1160, 1075 and 1019 cm-1; MS (EI) *m/z* 330; exact mass M+ 330.1090 (calcd for C18H18O6 330.1103); Anal. Calcd for C18H18O6: C, 65.45; H, 5.49. Found: C, 65.27; H, 5.38.

**5b** (Yield 58%) (Rf = 0.4 (hexane-ether = 1 : 2)): Yellow crystals (ethyl acetate); mp 88-89 °C; H (400 MHz, CDCl3) 1.34 (3H, t, *J* 7.1), 1.37 (3H, t, *J* 7.1), 2.40 (3H, s), 4.34 (2H, q, *J* 7.1), 4.41 (2H, q, *J* 7.1), 5.18 (2H, d, *J* 2.2), 7.16 (2H, d, *J* 8.1), 7.25 (2H, d, *J* 8.1) and 8.15 (1H, t, *J* 2.2). Selected NOE’s were between  8.15 and 7.16, and  5.18 and 7.16.; C (100.6 MHz, CDCl3) 13.93 (q), 14.03 (q), 21.56 (q), 62.43 (t), 62.44 (t), 70.04 (t), 127.33 (s), 129.10 (s), 129.91 (d), 130.03 (d), 132.23 (s), 132.45 (s), 137.07 (d), 140.54 (s), 163.17 (s), 164.96 (s) and 168.06 (s); IR (KBr) 2984, 1773, 1738, 1698, 1630, 1582, 1361, 1294, 1257, 1232, 1187, 1160, 1075, 1017 and 768 cm-1; MS (EI) *m/z* 344; exact mass M+ 344.1253 (calcd for C19H20O6 344.1260).

**5c** (Yield 41%) (Rf = 0.4 (hexane-ether = 1 : 2)); Yellow crystals; mp 88-90 °C (ethyl acetate-hexane); H (400 MHz, CDCl3) 1.33 (3H, t, *J* 7.1), 1.37 (3H, t, *J* 7.1), 3.86 (3H, s), 4.34 (2H, q, *J* 7.1), 4.50 (2H, q, *J* 7.1), 5.17 (2H, d, *J* 2.3), 6.96 (2H, d-like, *J* 8.8), 7.23 (2H, d-like, *J* 8.8) and 8.18 (1H, t, *J* 2.3). Selected NOE’s were between  8.15 and 7.23, and  5.17 and 7.23.; C (100.6 MHz, CDCl3) 13.94 (q), 14.05 (q), 55.55 (q), 62.34 (t), 62.40 (t), 70.08 (t), 114.73 (d), 126.01 (s), 127.80 (s), 128.29 (s), 132.00 (d), 132.77 (s), 136.94 (d), 161.05 (s), 163.34 (s), 165.17 (s) and 168.24 (s); IR (KBr) 2990, 1779, 1725, 1698, 1576, 1516, 1361, 1307, 1270, 1178, 1083, 1019 and 830 cm-1; MS (EI) *m/z* 360; exact mass M+ 360.1198 (calcd for C19H20O7 360.1209).

**5d** (Yield 53%) (Rf = 0.5 (hexane-ether = 1 : 1)); Yellow oil; H (400 MHz, CDCl3) 1.34 (3H, t, *J* 7.1), 1.38 (3H, t, *J* 7.0), 1.48 (3H, d, *J* 6.3), 4.35 (2H, q, *J* 7.1), 4.41 (2H, qd, *J* 7.1 and 1.2), 5.65 (1H, qd, *J* 6.3 and 2.0), 7.33-7.45 (5H, m) and 8.07 (1H, d, *J* 2.0). Selected NOE’s were between  8.07 and 7.33-7.45,  1.48 and 7.33-7.45 and  5.65 and 7.33-7.45.; C (100.6 MHz, CDCl3) 13.91 (q), 14.00 (q), 20.58 (q), 62.48 (t), 77.10 (d), 129.09 (d), 129.56 (d), 129.67 (d), 130.14 (s), 132.67 (s), 133.78 (s), 134.78 (s), 136.00 (d), 163.05 (s), 164.81 (s) and 167.21 (s); IR (neat) 2986, 1771, 1734, 1448, 1369, 1255, 1224, 1191, 1089 and 1033 cm-1; MS (EI) *m/z* 344; exact mass M+ 344.1284 (calcd for C19H20O6 344.1260).

**5e** (Yield 46%) (Rf = 0.3 (hexane-ether = 3 : 1)): Yellow oil; H (400 MHz, CDCl3) 0.900 (3H, t, *J* 7.2), 1.34 (3H, t, *J* 7.1), 1.38 (3H, t, *J* 7.0), 1.41-1.63 (3H, m), 1.82-1.90 (1H, m), 4.34 (2H, q, *J* 7.1), 4.38-4.47 (2H, m), 5.55 (1H, ddd, *J* 8.4, 2.2 and 2.0), 7.32-7.45 (3H, m) and 8.05 (1H, d, *J* 2.0). Selected NOE’s were between  8.05 and 7.32-7.45 and  5.55 and 7.32-7.45.; C (100.6 MHz, CDCl3) 13.60 (q), 13.94 (q), 14.03 (q), 18.06 (t), 36.38 (t), 62.47 (t), 62.49 (t), 80.44 (d), 129.09 (s), 129.09 (d), 129.56 (d), 129.69 (d), 132.86 (s), 133.14 (s), 134.85 (s), 135.94 (d), 163.09 (s), 164.88 (s) and 167.46 (s); IR (neat) 2966, 2938, 1771, 1734, 1570, 1452, 1369, 1224, 1189, 1089 and 1025 cm-1; MS (EI) *m/z* 372; exact mass M+ 372.1547 (calcd for C21H24O6 372.1573).

**5f** (Yield 29%) (Rf = 0.3 (hexane-ether = 1 : 2)): Yellow crystals; mp 98-100 ºC; H (400 MHz, CDCl3) 3.89 (3H, s), 3.94 (3H, s), 5.19 (2H, d, *J* 2.4), 7.26-7.29 (2H, m), 7.41-7.48 (3H, m) and 8.26 (1H, t, *J* 2.4). Selected NOE’s were between  8.26 and 7.26-7.29, and  5.19 and 7.26-7.29.; C (100.6 MHz, CDCl3) 53.29 (q), 53.45 (q), 69.98 (t), 128.15 (s), 129.16 (d), 129.98 (d), 130.03 (d), 134.89 (s), 137.66 (d), 163.38 (s), 165.48 (s) and 167.94 (s); IR (KBr) 1773, 1738, 1727, 1562, 1435, 1365 and 1222 cm-1; MS (EI) *m/z* 302; exact mass M+ 302.0788 (calcd for C16H14O6 302.0790).

**5g** (Yield 50%, THF was not added.) (Rf = 0.4 (hexane-ether = 1 : 1)): Yellow oil; H (400 MHz, CDCl3) 1.33 (6H, d, *J* 6.2), 1.36 (6H, d, *J* 6.4), 5.17 (2H, d, *J* 2.3), 5.19 (1H, septet, *J* 6.3), 5.31 (1H, septet, *J* 6.3), 7.25-7.27 (2H, m), 7.37-7.46 (3H, m) and 8.14 (1H, t, *J* 2.3). Selected NOE’s were between  8.14 and 7.25-7.27, and  5.17 and 7.25-7.27.; C (100.6 MHz, CDCl3) 21.52 (q), 21.64 (q), 69.86 (t), 70.07 (d), 70.51 (d), 128.31 (s), 129.09 (d), 129.75 (d), 129.78 (d), 130.57 (s), 131.57 (s), 134.96 (s), 136.58 (d), 162.60 (s), 164.13 (s) and 167.85 (s); IR (neat) 2970, 1778, 1729, 1694, 1589, 1263, 1187 and 1080 cm-1; MS (EI) *m/z* 358; exact mass M+ 358.1369 (calcd for C20H22O6 358.1416).

**Cyclization procedure for 2.** To a solution of **1** (100 mg, 0.37 mmol) in dichloromethane (0.9 mL) was added ZnBr2 (97 mg, 0.43 mmol) at 0 °C. The mixture was allowed to warm to room temperature and stirred for 20 h. The reaction mixture was quenched by triethylamine (0.12 mL, 87 mg, 0.86 mmol) and then saturated aqueous NaHCO3. The mixture was extracted with dichloromethane and the organic phase was washed with water, dried (Na2SO4), and evaporated *in vacuo*. The residue was purified by column chromatography over silica gel eluting with hexane-ether (1 : 2) to give **2** (45 mg, 45%) (Rf = 0.40) and **3** (10.2 mg, 10%) (Rf = 0.44). **2**: Colorless oil; H (400 MHz, CDCl3) 1.29 (6H, t, *J* 7.1), 4.20-4.28 (4H, m), 4.73 (1H, s), 5.03 (2H, s), 5.63 (1H, d, *J* 17.8), 5.65 (1H, d, *J* 11.0) and 6.90 (1H, dd, *J* 17.8 and 11.0); C (100.6 MHz, CDCl3) 14.08 (q), 48.21 (d), 62.55 (t), 69.56 (t), 119.60 (s), 123.55 (t), 127.55 (d), 158.01 (s), 166.55 (s) and 173.39 (s); IR (neat) 2986, 1765-1734, 1659, 1601, 1448, 1371, 1310, 1228, 1158 and 1031 cm-1; MS (EI) *m/z* 268; exact mass M+ 268.0954 (calcd for C13H16O6 268.0947). **3**: Colorless crystals; mp 29-30 °C; H (400 MHz, CDCl3) 1.296 (3H, t, *J* 7.1), 1.302 (3H, t, *J* 7.1), 1.85 (3H, t, *J* 2.4), 3.54 (1H, d, *J* 7.1), 3.98 (1H, d, *J* 4.0), 4.21-4.33 (4H, m) and 4.69-4.82 (3H, m); C (100.6 MHz, CDCl3) 3.72 (q), 14.00 (q), 14.06 (q), 54.45 (t), 55.04 (d), 62.15 (t), 62.17 (t), 69.77 (d), 72.27 (s), 84.18 (s), 166.98 (s), 167.16 (s) and 171.13 (s); IR (KBr) 3432, 2978, 2248, 1750-1709, 1456, 1394, 1369, 1348, 1129, 1096, 1031, 949 and 841 cm-1; MS (EI) *m/z* 286; exact mass M+ 286.1012 (calcd for C13H18O7 286.1053).

**Thermal reaction of 5a with 8.** The mixture of **5a** (60 mg, 0.18 mmol) and 1,1-diethoxyethylene5 (**8**) (156 mg, 0.91 mmol) in toluene (0.43 mL) was heated at 80 °C for 6 h. The reaction mixture was cooled and concentrated *in vacuo*. The residue was purified by column chromatography over silica gel eluting with hexane-ether (1 : 2) to give 1 : 2 mixture of **9a** and **9b** (72 mg, 78%) (Rf = 0.5). Pure **9b** (38 mg) was isolated by crystalization of the mixture from hexane-ethyl acetate. The filtrate contained a 2 : 1 mixture of **9a** and **9b** (34 mg). **9b**: Colorless crystals; mp 154-155 °C (hexane-ethyl acetate); H (400 MHz, CDCl3) 1.00 (3H, t, *J* 7.0), 1.09 (3H, t, *J* 7.0), 1.31 (3H, t, *J* 7.1), 1.34 (3H, t, *J* 7.1), 2.24 (1H, d, *J* 13.6), 2.98 (1H, dd, *J* 13.6 and 1.5), 3.32-3.60 (4H, m), 3.97 (1H, bs), 4.11-4.37 (4H, m), 4.57 (1H, d, *J* 17.2), 4.67 (1H, dd, *J* 17.2 and 0.9) and 7.24-7.34 (5H, m). Selected NOE’s are between  2.98 and ca. 3.32,  ca. 3.60 and 3.97,  3.97 and 4.67,  3.97 and 7.24-7.34, and  4.57 and 7.24-7.34.; C (100.6 MHz, CDCl3) 13.98 (q), 14.07 (q), 15.12 (q), 15.15 (q), 33.58 (t), 46.69 (d), 53.96 (s), 55.86 (t), 56.62 (t), 61.81 (t), 62.76 (t), 70.23 (t), 100.46 (s), 126.06 (s), 127.64 (d), 128.33 (d), 129.94 (d), 136.10 (s), 161.60 (s), 168.32 (s), 169.41 (s) and 170.93 (s). Selected HMBC correlations are between  2.24, 2.98 (C*H*2) and 168.32, 169.41 (*C*=O),  3.97 (C*H*) and 136.10 (C of Ph), and  4.57, 4.67 (C*H*2) and 170.93 (*C*=O),  7.24-7.34 (Ph-H) and 136.10 (C of Ph).; IR (KBr) 2997, 2938, 2094, 1760, 1734, 1686, 1313, 1228, 1100 and 1021 cm-1; MS (EI) *m/z* 446; exact mass M+ 446.1937 (calcd for C24H30O8 446.1941); Anal. Calcd for C24H30O8: C, 64.56; H, 6.77. Found: C, 64.33; H, 6.71.

**9a** (as a mixture with **9b**): Colorless oil; H (400 MHz, CDCl3) 1.10 (3H, t, *J* 7.1), 1.22 (3H, t, *J* 7.0), 1.27 (3H, t, *J* 7.1), 1.33 (3H, t, *J* 7.1), 2.46 (1H, dd, *J* 14.5 and 5.1), 2.60 (1H, dd, *J* 14.5 and 11.3), 3.44-3.66 (3H, m), 3.81 (1H, dd, *J* 11.3 and 5.1), 4.08-4.47 (5H, m), 4.45 (1H, dd, *J* 17.4 and 0.7), 4.63 (1H, dd, *J* 17.4 and 1.3), 7.20-7.22 (2H, m) and 7.30-7.39 (3H, m). Selected NOE’s are between  2.46 and ca. 3.66,  2.46 and 3.81,  2.60 and 7.20-7.22,  3.81 and 4.63,  3.81 and 7.20-7.22, and  4.45 and 7.20-7.22.; C (100.6 MHz, CDCl3) 14.02 (q), 14.09 (q), 15.00 (q), 15.44 (q), 37.98 (t), 39.65 (d), 57.05 (t), 59.26 (t), 61.78 (t), 62.27 (t), 63.06 (s), 70.40 (t), 102.35 (s), 127.34 (s), 127.99 (d), 129.28 (d), 139.15 (s), 161.15 (s), 165.42 (s), 165.73 (s) and 171.50 (s). Selected HMBC correlations are between  2.46, 2.60 (C*H*2) and 139.15 (C of Ph),  3.81 (C*H*) and 139.15 (C of Ph), and  4.45, 4.63 (C*H*2) and 171.50 (*C*=O),  7.30-7.39 (Ph-H) and 139.15 (C of Ph).; IR (neat) 2982, 1765, 1603, 1446, 1232 and 913 cm-1; MS (EI) *m/z* 446; exact mass M+ 446.1989 (calcd for C24H30O8 446.1941).

**7b** (one isomer, isolated by column chromatography): (Yield 15%) (Rf = 0.5 (hexane-ether = 1 : 2)); Colorless oil; H (400 MHz, CDCl3) 0.822 (3H, t, *J* 7.3), 1.17-1.44 (4H, m), 1.30 (3H, t, *J* 7.1), 1.33 (3H, t, *J* 7.0), 2.49-2.58 (2H, m), 3.25 (1H, ddd, *J* 9.2, 6.7 and 6.7), 3.51 (1H, ddd, *J* 9.2, 6.5 and 6.5), 3.65 (1H, dddd, *J* 6.5, 5.0 and 3.3), 3.74 (1H, d, *J* 5.0), 4.19-4.34 (4H, m,), 4.56 (1H, d, *J* 17.4), 4.67 (1H, dd, *J* 17.4 and 1.1), 7.15-7.17 (2H, m) and 7.29-7.38 (3H, m). Selected NOE’s are between  3.65 and 7.15-7.17 and  3.74 and 7.15-7.17.; C (100.6 MHz, CDCl3) 13.88 (q), 14.00 (q), 14.06 (q), 19.13 (t), 31.78 (t), 32.38 (t), 47.74 (d), 52.27 (s), 62.29 (t), 62.62 (t), 69.77 (t), 70.51 (t), 78.74 (d), 125.76 (s), 127.95 (d), 128.43 (d), 129.22 (d), 137.90 (s), 161.96 (s), 168.56 (s), 169.42 (s) and 170.76 (s). Selected HMBC correlations are between  2.49-2.58 (C*H*2) and 168.56, 169.42 (*C*=O),  3.74 (C*H*) and 137.90 (C of Ph), and  3.74 (C*H*) and 78.74 (C*H*-O) and  7.29-7.38 (Ph-H) and 137.90 (C of Ph).; IR (neat) 2940, 1750, 1734, 1686, 1458, 1369 and 1342 cm-1; MS (EI) *m/z* 430; exact mass M+ 430.2005 (calcd for C24H30O7 430.1992).

**7a+7b’** (1 :1 mixture): (Yield 62%) (Rf = 0.4 (hexane-ether = 1 : 2)); Colorless oil; H (400 MHz, CDCl3) 0.766 (3H, t, *J* 7.3), 0.822 (3H, t, *J* 7.2), 1.09-1.37 (20H, m, **7a**+**7b’**), 2.26 (1H, ddd, *J* 14.2, 8.6 and 7.2, **7a**), 2.38-2.44 (1H+1H, m, **7a**+**7b’**), 2.74 (1H, dd, *J* 13.5 and 7.6, **7b’**), 3.10 (1H, ddd, *J* 9.0, 6.8 and 6.8), 3.23-3.34 (2H, m), 3.45 (1H, ddd, *J* 9.0, 6.3 and 6.3), 3.77-3.82 (1H+1H, m, **7a**+**7b’**), 3.92 (1H, d, *J* 4.6, **7b’**), 4.24-4.34 (4H+4H+1H, m, **7a**+**7b’**), 4.58 (2H, s, **7a**), 4.58 (1H, dd, *J* 17.6 and 1.1, **7b’**), 4.69 (1H, d, *J* 17.6, **7b’**), 7.17-7.21 (2H+2H, m, **7a**+**7b’**) and 7.25-7.36 (3H+3H, m, **7a**+**7b’**). Selected NOE’s are between  3.77-3.82 and 3.92 for **7b’** and  4.24-4.34 and 3.77-3.82 for **7a**.; C (100.6 MHz, CDCl3) 13.87 (q), 13.98 (q), 14.00 (q), 14.13 (q), 19.11 (t), 19.13 (t), 31.57 (t), 31.70 (t), 32.88 (t, **7a**), 33.15 (t, **7b’**), 40.46 (d, **7a**), 46.24 (d, **7b’**), 52.45 (s, **7b’**), 57.97 (s, **7a**), 61.90 (t), 62.09 (t), 62.45 (t), 62.61 (t), 69.89 (t), 69.98 (t), 70.38 (t), 70.43 (t), 75.00 (d, **7b’**), 78.70 (d, **7a**), 125.13 (s, **7a**), 125.75 (s, **7b’**), 127.53 (d), 127.77 (d), 128.15 (d, **7a**), 128.37 (d), 128.99 (d), 130.03 (d, **7b’**), 135.82 (s, **7b’**), 140.27 (s, **7a**), 162.47 (s, **7b’**), 163.92 (s, **7a**), 166.32 (s, **7a**), 168.28 (s, **7a**), 168.65 (s, **7b’**), 169.39 (s, **7b’**), 170.50 (s) and 170.83 (s). Selected HMBC correlations are between  3.77-3.82 (C*H*) and 140.27 (C of Ph) for **7a**,  3.77-3.82 (C*H*) and 32.88 (*C*H2) for **7a**,  7.25-7.36 (Ph-H) and 140.27 (C of Ph) for **7a**,  3.77-3.82 (C*H*) and 46.24 (*C*H) for **7b**,  3.92 (C*H*) and 75.00 (*C*H-O) for **7b’**,  2.38-2.44, 2.74 (C*H*2) and 168.65, 169.39 (*C*=O) for **7b’**,  3.92 (C*H*) and 135.82 (C of Ph) for **7b’**, and  7.25-7.36 (Ph-H) and 135.82 (C of Ph) for **7b’**.; IR (neat) 2962, 2938, 2874, 1770, 1734, 1676, 1603, 1455, 1369, 1342, 1236 and 1096 cm-1; MS (EI) *m/z* 430; exact mass M+ 430.2001 (calcd for C24H30O7 430.1992).

## References

1 K. Sonogashira, Y. Tohda and N. Hagihara, *Tetrahedron Lett*., 1975, 4467.

2 H. K. Hall, Jr. and R. C*.* Sentman, *J. Org. Chem*., 1982, **47**, 4572.

3 L. F. Tietze and M. Bratz, *Org. Synth*., 1992, **71**, 214.

4 S. F. Karaev, Z. M. Tsalikova and I. A. Shikhiev, *Azerb. Khim. Zh*., 1974, 30.

5 Qi-H. Zheng and J. Su, *Synth. Commun*., 1999, **29**, 3467.
